# Supplementary material for: Development of a [68Ga]-ghrelin analogue for PET imaging of the ghrelin receptor (GHS-R1a)
Source: Royal Society of Chemistry journal article supplement (doi:10.1039/c8md00210j), 2018-01-01
Supplement: c8md00210j1.pdf [file c8md00210j1.pdf]

## Supporting Information

### Development of a [<sup>68</sup>Ga]-Ghrelin Analogue for PET

### Imaging of the Ghrelin Receptor (GHS-R1a)

*C. L. Charron,<sup>a</sup> M. S. McFarland,<sup>a</sup> S. Dhanvantari<sup>b,c</sup> and L. G. Luyt<sup>a,d,e</sup>*

<sup>a</sup> Department of Chemistry, University of Western Ontario, 1151 Richmond Street, London, Ontario N6A 5B7, Canada

<sup>b</sup> Lawson Health Research Institute, 268 Grosvenor Street, London, Ontario N6A 4V2, Canada

<sup>c</sup> Departments of Medical Biophysics, University of Western Ontario, 1151 Richmond Street, London, Ontario N6A 5B7, Canada

<sup>d</sup> Department of Oncology, University of Western Ontario, 1151 Richmond Street, London, Ontario N6A 5B7, Canada

<sup>e</sup> London Regional Cancer Program, Lawson Health Research Institute, 790 Commissioners Road East, London, Ontario N6A 4L6, Canada

#### Table of Contents:

|                                                                             |    |
|-----------------------------------------------------------------------------|----|
| Figure S1: Compound 7 HPLC .....                                            | S2 |
| Figure S2: Compound [ <sup>69/71</sup> Ga]-7 HPLC .....                     | S2 |
| Scheme S1: Compound [ <sup>68</sup> Ga]-7 Radiolabelling Scheme .....       | S3 |
| Table S1: Compound [ <sup>68</sup> Ga]-7: Radiolabelling Optimization ..... | S3 |
| Table S2: Serum Stability of [ <sup>68</sup> Ga]-7 .....                    | S3 |

Figure S1: Compound 7 HPLC (Method: 20% to 60% ACN in H<sub>2</sub>O – 15 minutes)

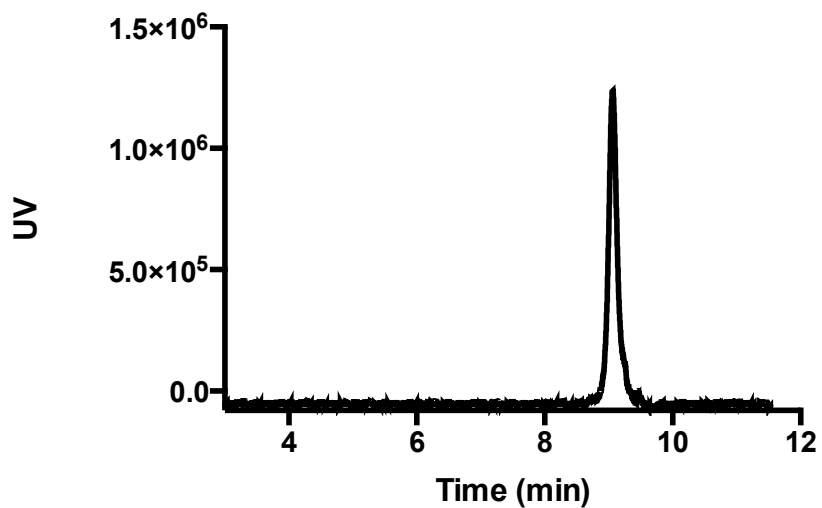

Figure S2: Compound [<sup>69/71</sup>Ga]-7 HPLC (Method: 30% to 80% ACN in H<sub>2</sub>O – 15 minutes)

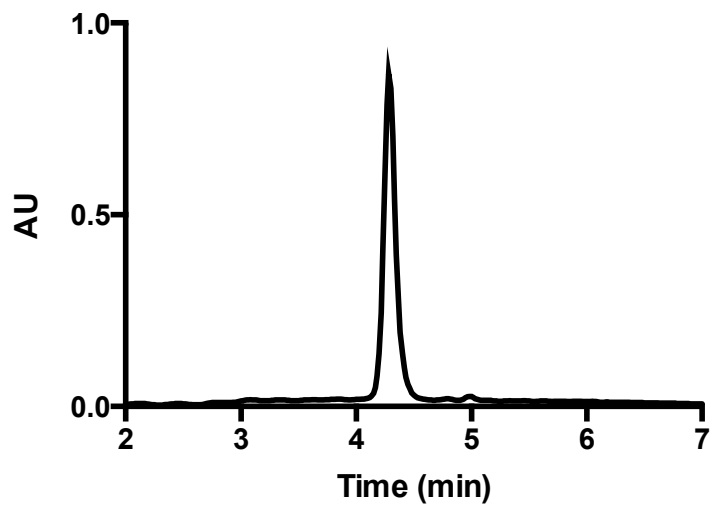

### Scheme S1: Compound [<sup>68</sup>Ga]-7 Radiolabelling Scheme

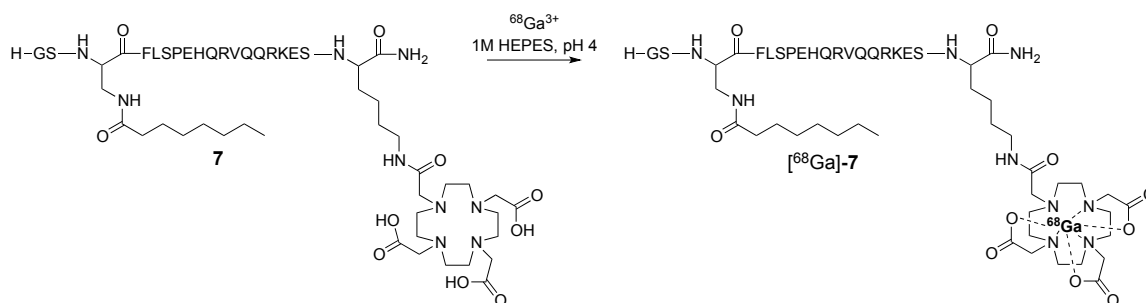

Table S1: Compound [<sup>68</sup>Ga]-7 Radiolabelling Optimization

| Mass of 7 (μg) | Buffer      | Concentration (μM) | Decay Corrected Yield (%) | Specific Activity (GBq/μmol) |
|----------------|-------------|--------------------|---------------------------|------------------------------|
| 100            | 0.5 M HEPES | 7.83               | 54                        | 4.51                         |
| 50             | 1 M HEPES   | 3.91               | 96                        | 3.84-4.28                    |
| 25             | 0.5 M HEPES | 1.96               | 45-91                     | 17.6-19.0                    |
| 20             | 1M HEPES    | 1.56               | 54-83                     | 10.2-22.8                    |
| 10             | 1 M HEPES   | 0.78               | 17-23                     | 5.39-7.72                    |

Table S2: Serum Stability of [<sup>68</sup>Ga]-7

| Time (min) | Intact [ <sup>68</sup> Ga]-7 (%) |
|------------|----------------------------------|
| 0          | 100 ± 20                         |
| 60         | 110 ± 8                          |
| 120        | 98 ± 8                           |
| 240        | 112 ± 10                         |
| 360        | 100 ± 15                         |
| 1440       | 71 ± 8                           |
